# Supplementary material for: Global seismic energy scaling relationships based on the type of faulting
Source: Copernicus journal article supplement (doi:10.5194/egusphere-2023-1357), 2023-07-19
Supplement: Supplementary file 1 [file egusphere-2023-1357-supplement.pdf]

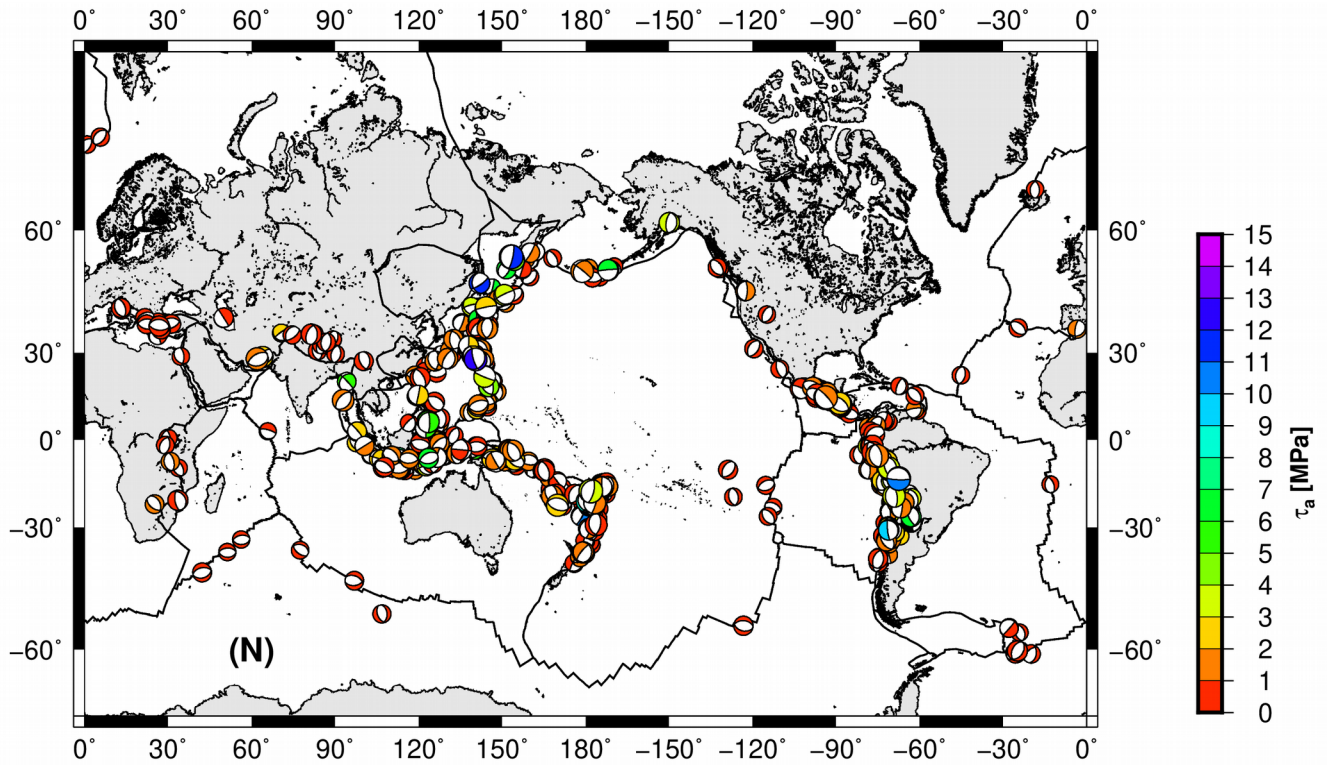

Figure S1. Spatial distribution of apparent stress for N events.

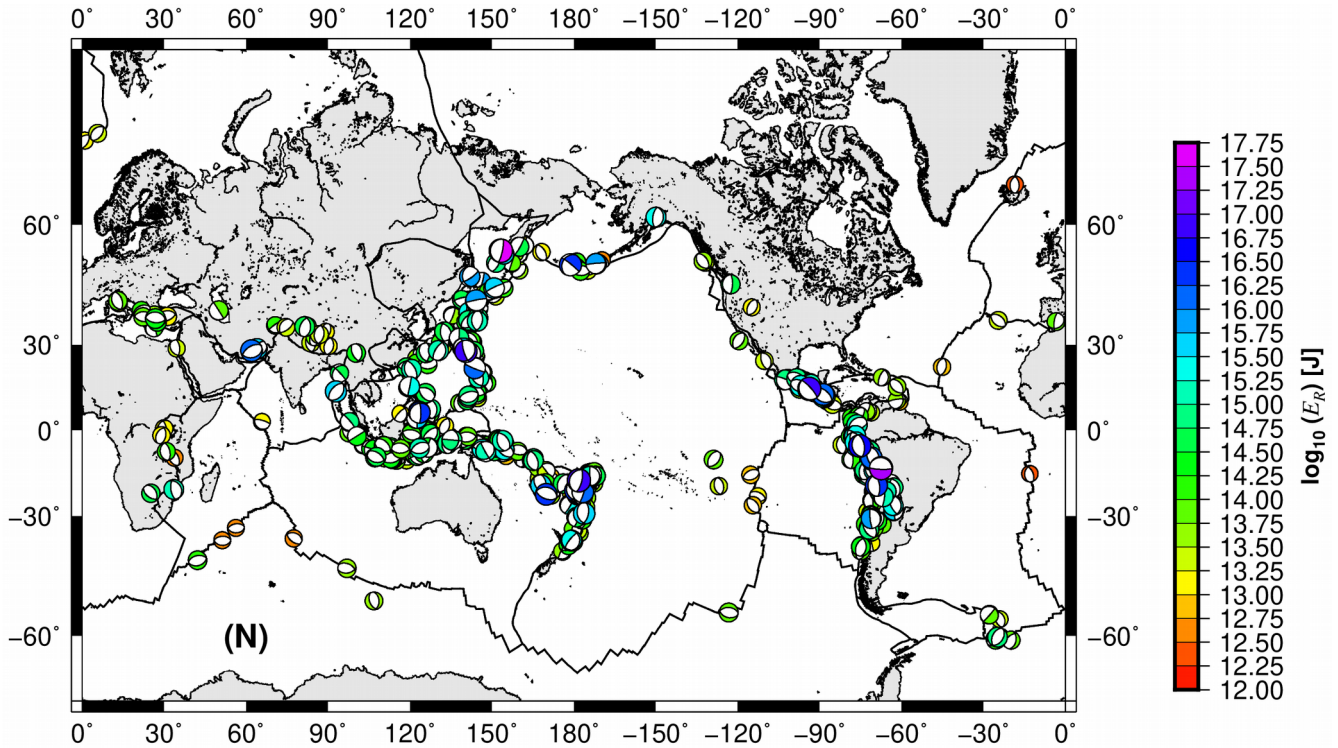

Figure S2. Spatial distribution of radiated seismic energy for N events.

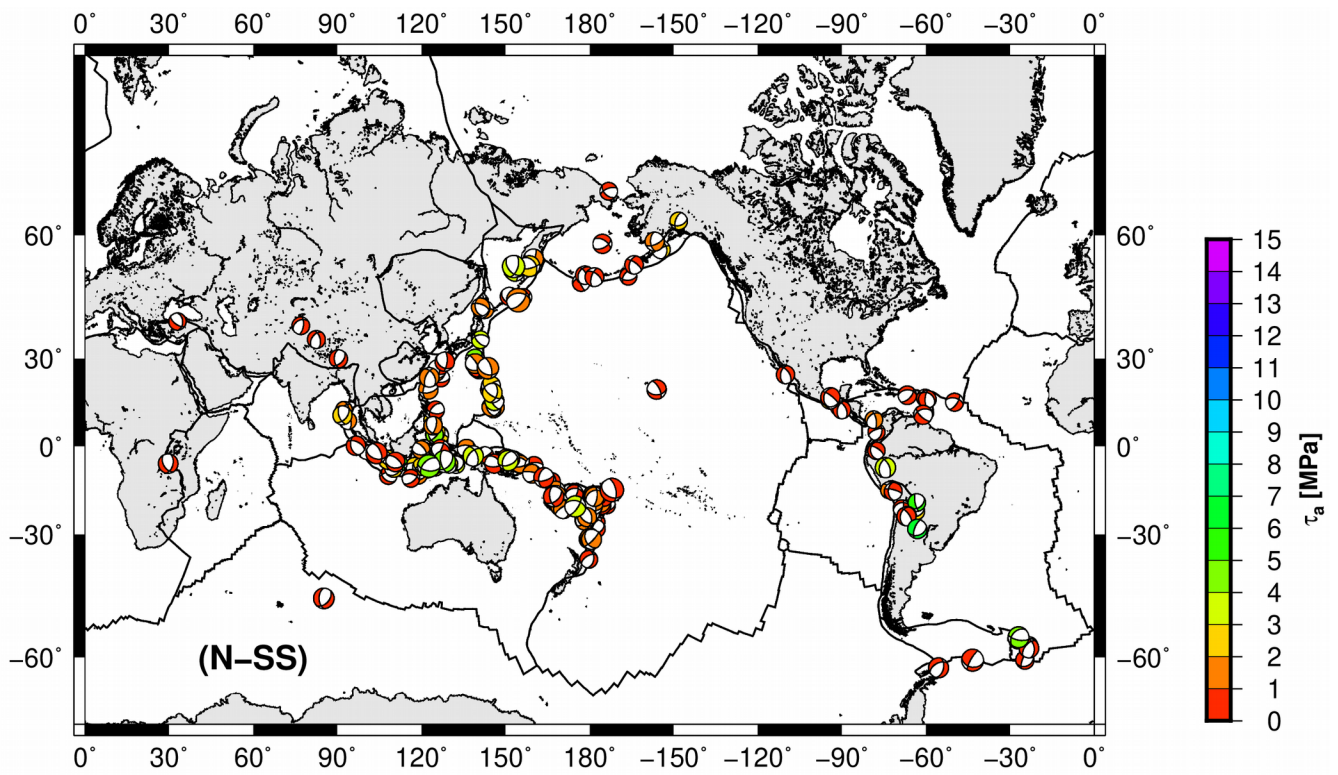

**Figure S3.** Spatial distribution of apparent stress for N-SS events.

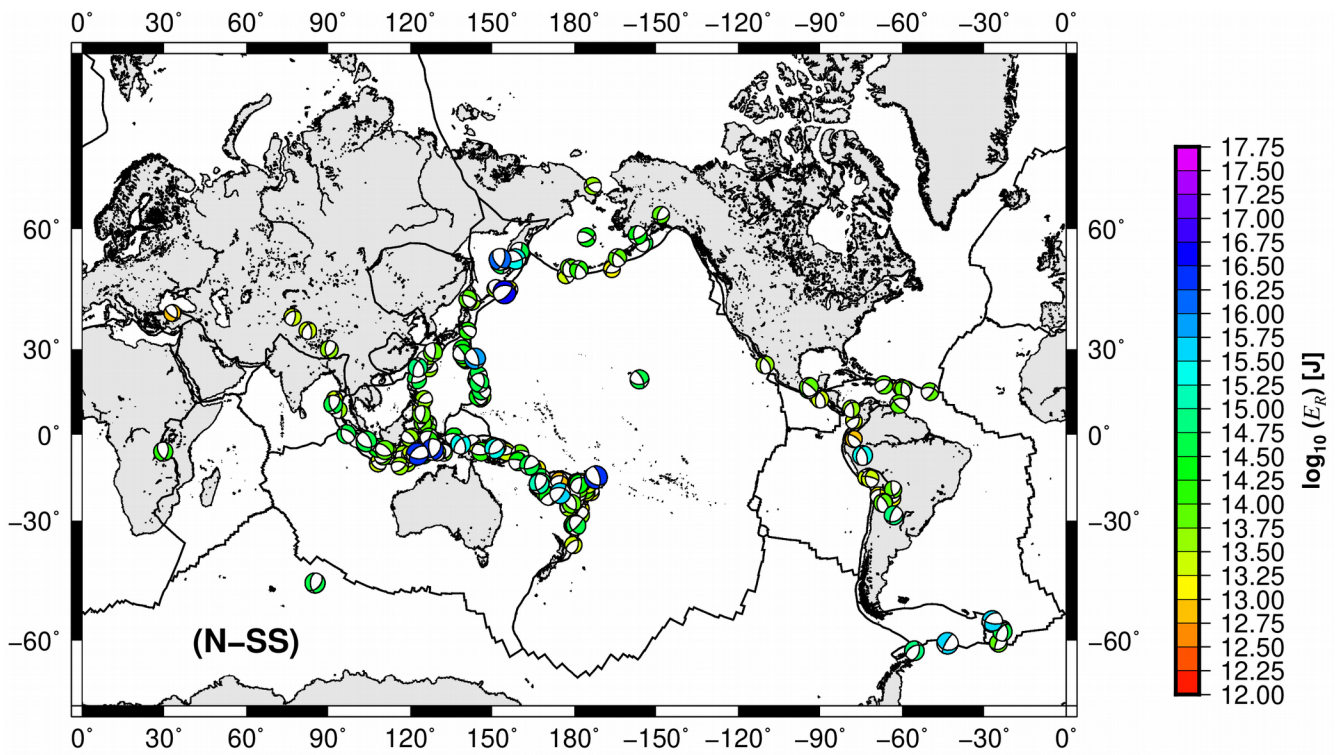

**Figure S4.** Spatial distribution of radiated seismic energy for N-SS events.



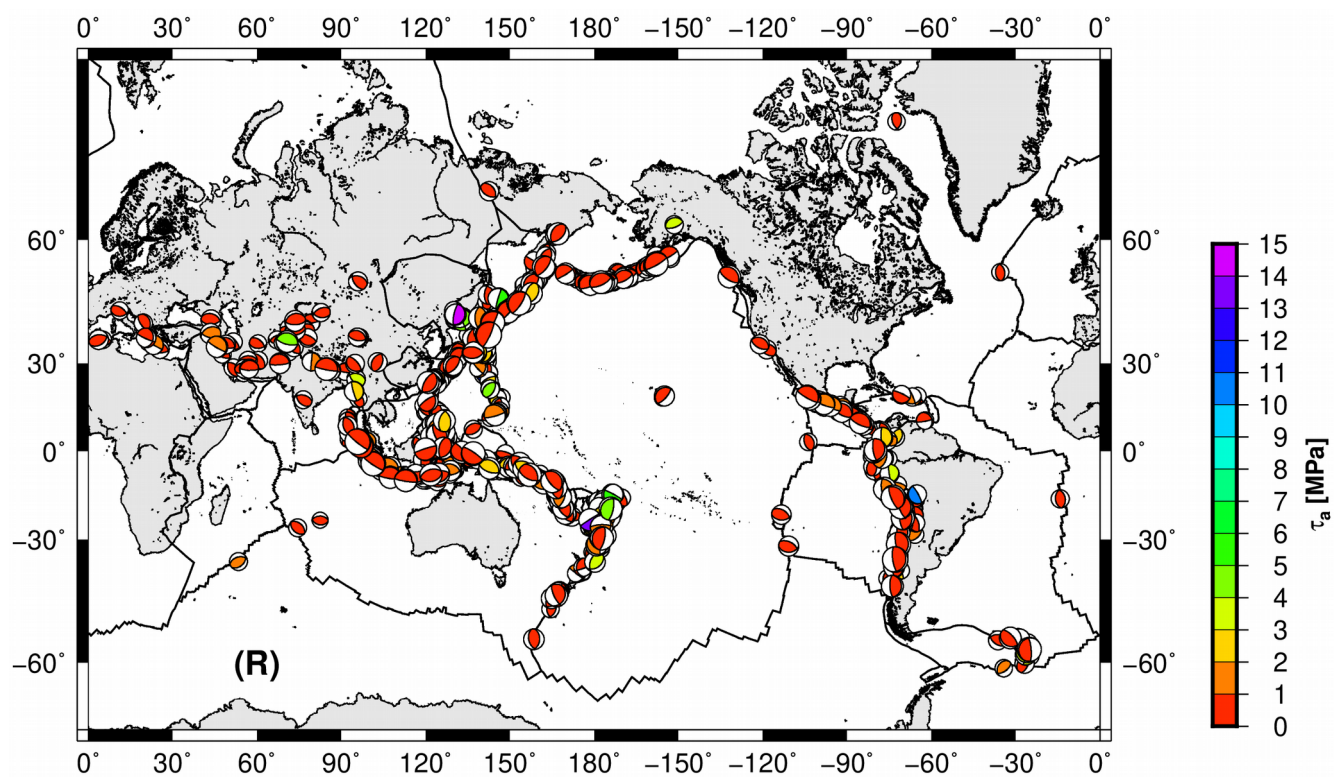

Figure S5. Spatial distribution of apparent stress for R events.

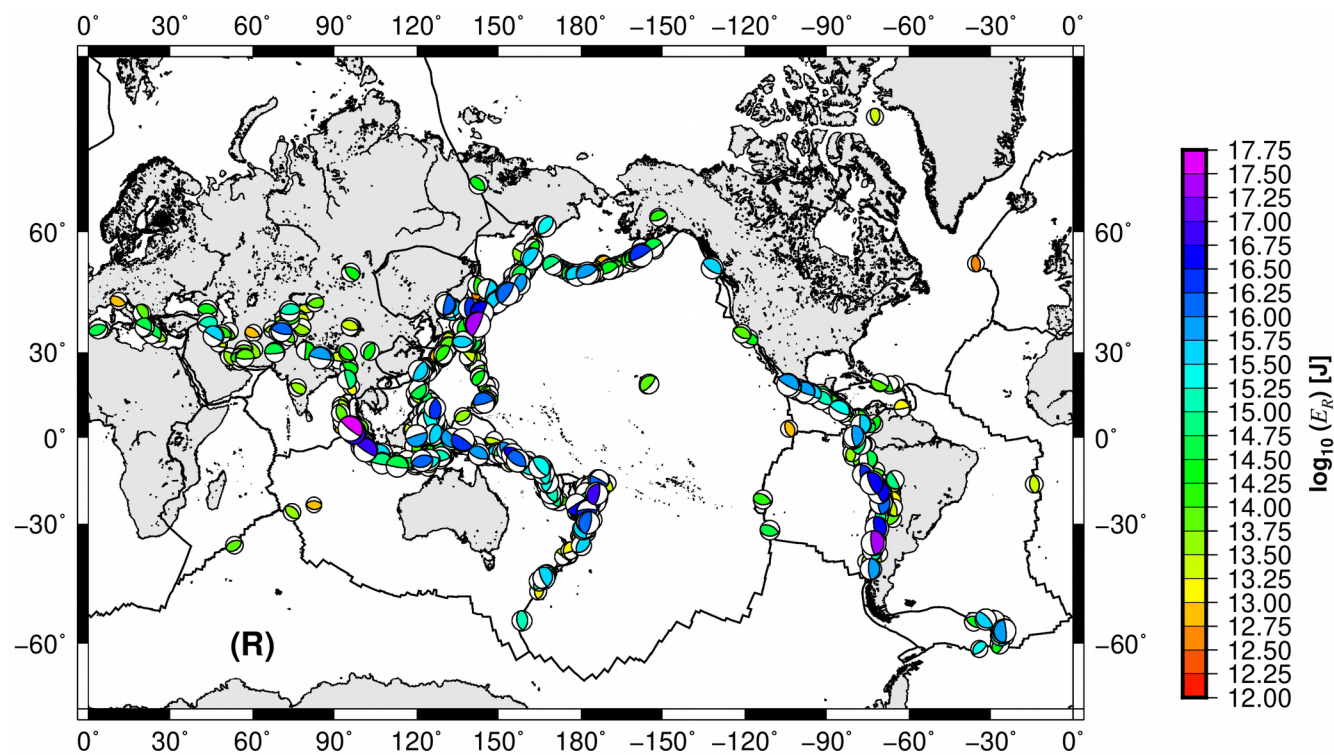

Figure S6. Spatial distribution of radiated seismic energy for R events.

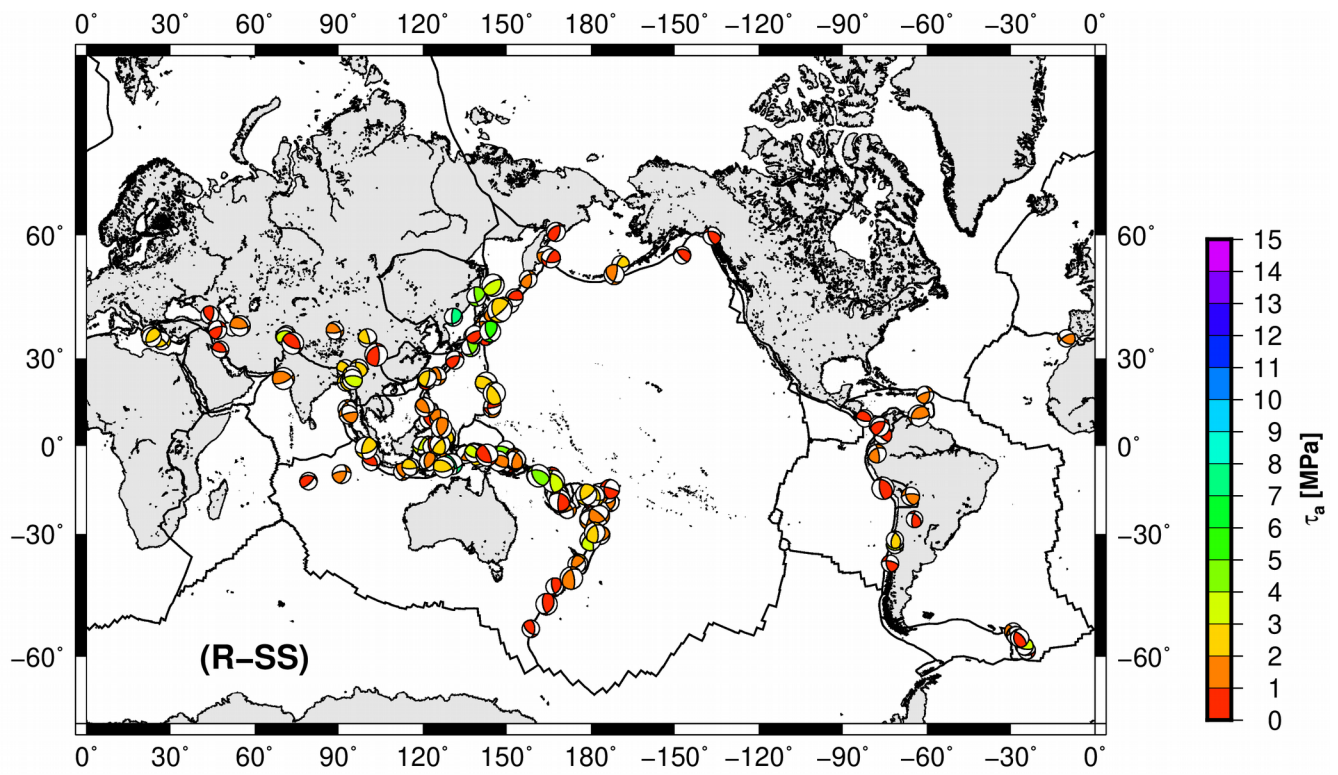

Figure S7. Spatial distribution of apparent stress for R-SS events.

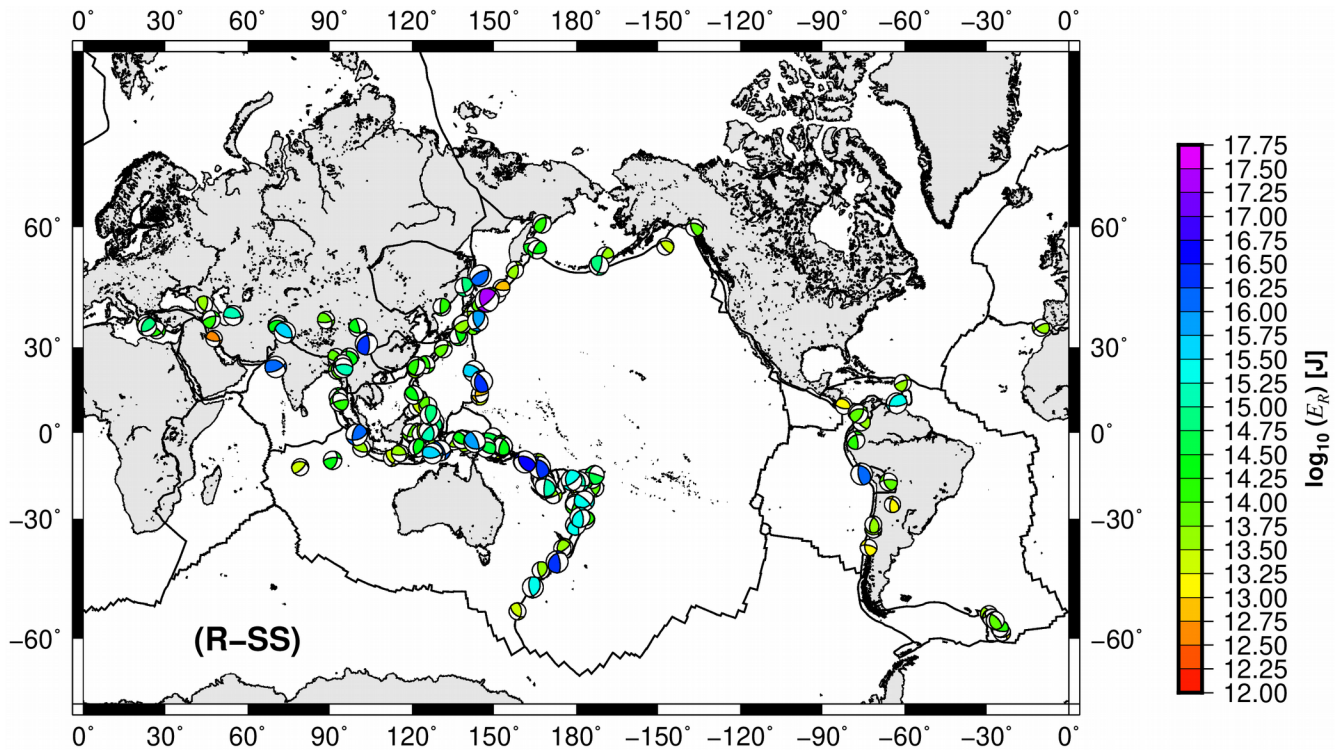

Figure S8. Spatial distribution of radiated seismic energy for R-SS events.



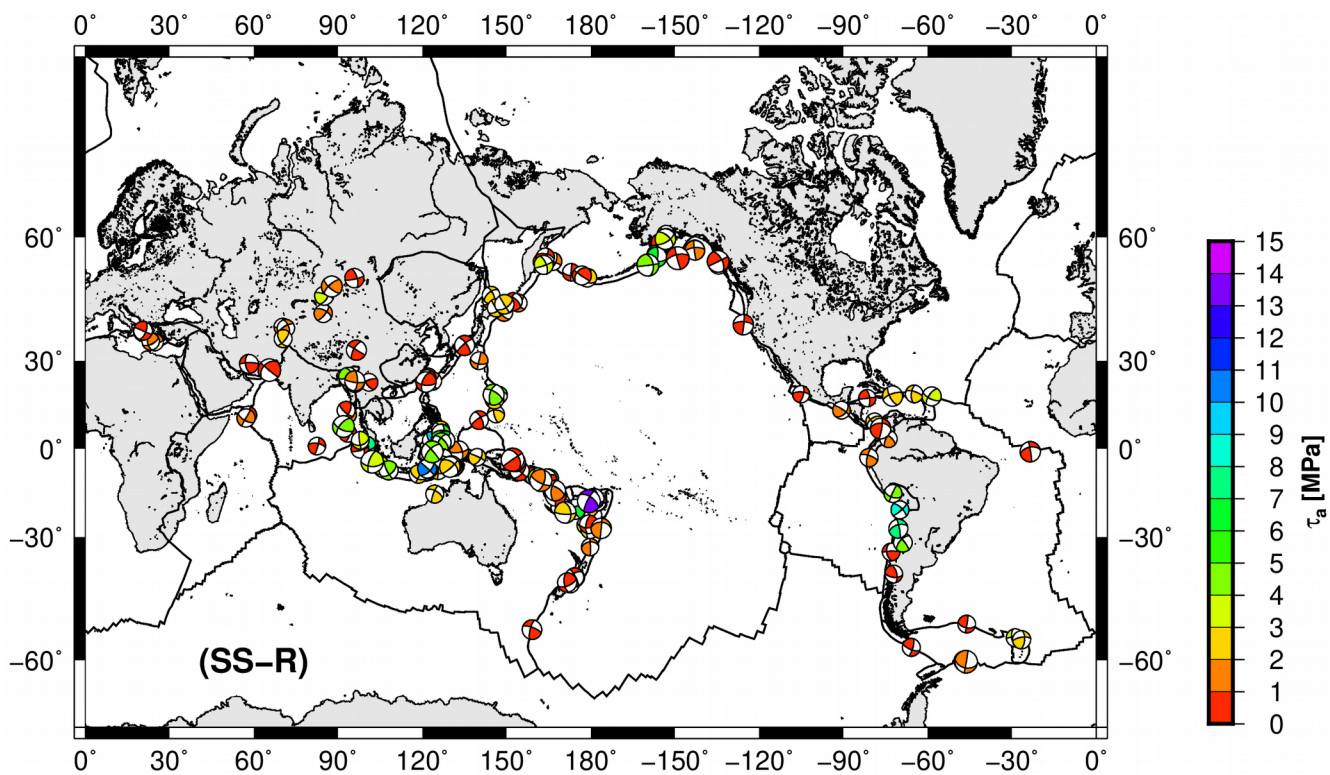

Figure S9. Spatial distribution of apparent stress for SS-R events.

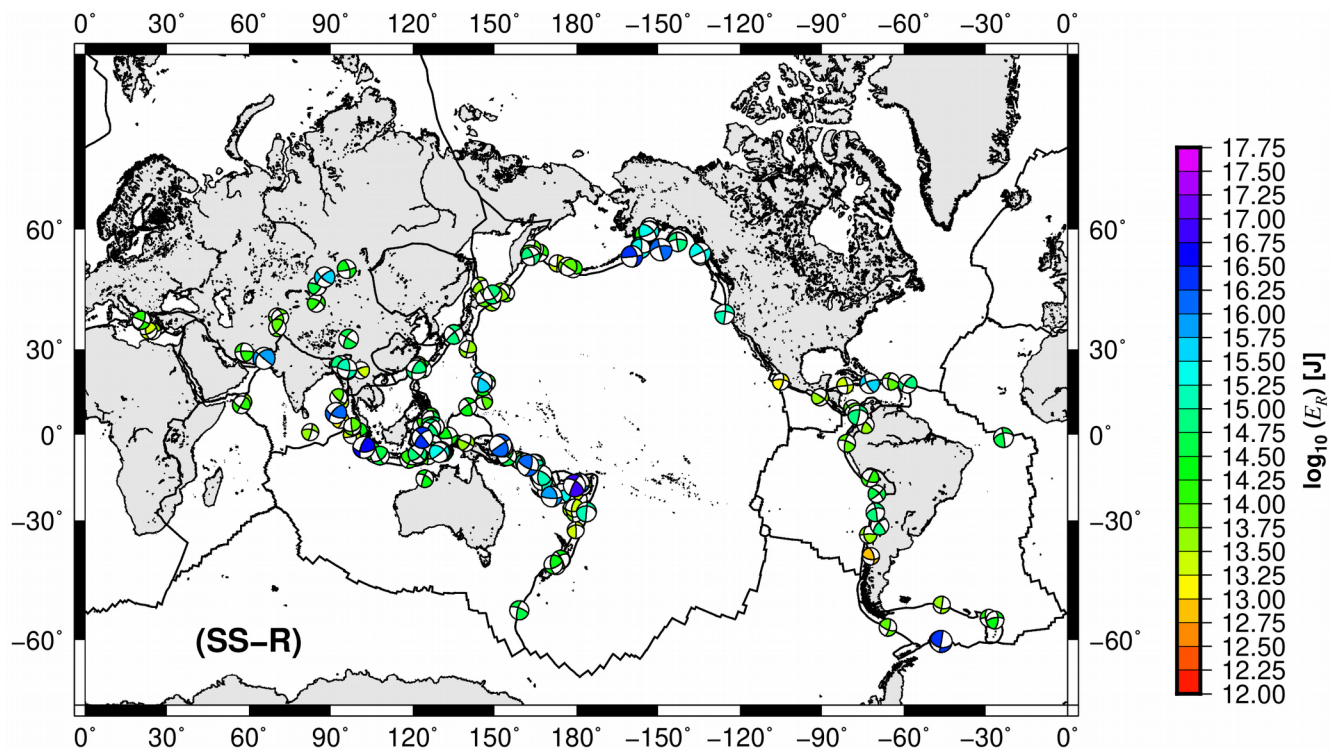

Figure S10. Spatial distribution of radiated seismic energy for SS-R events.

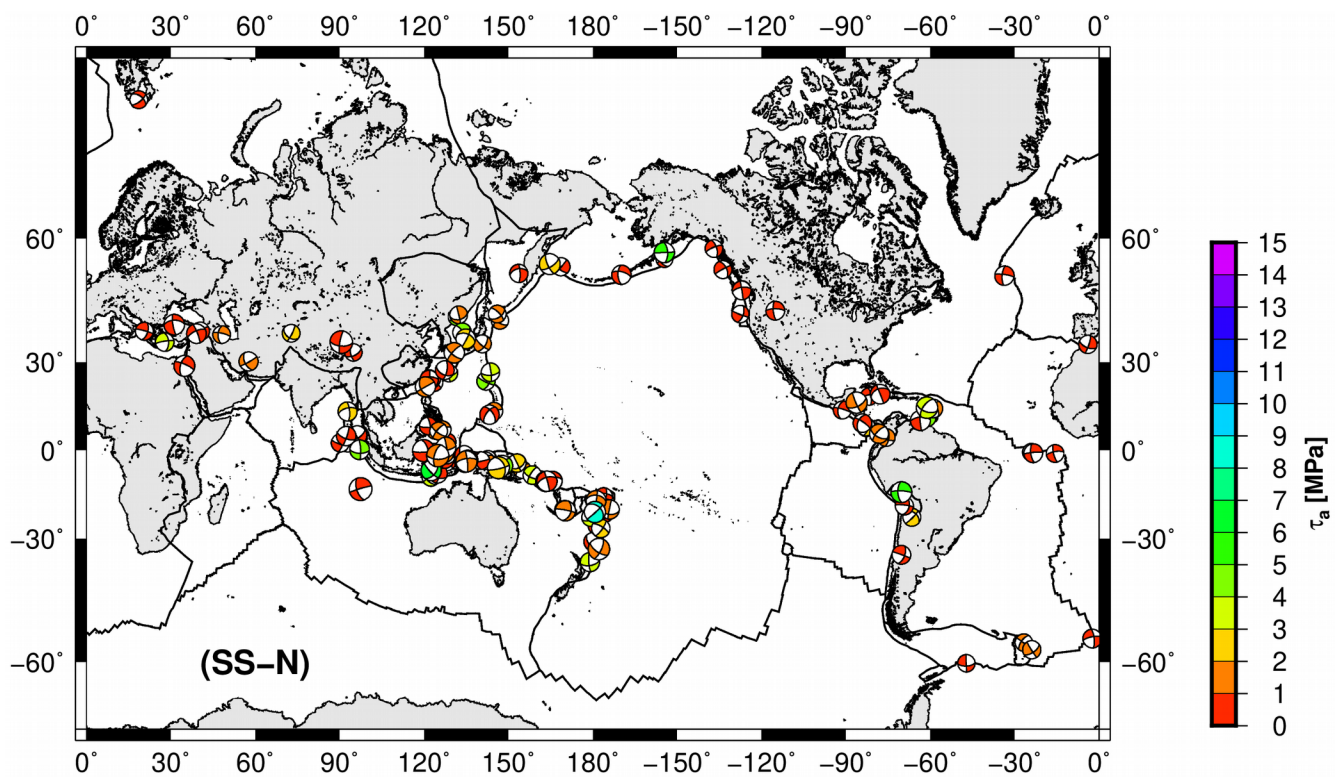

Figure S11. Spatial distribution of apparent stress for SS-N events.

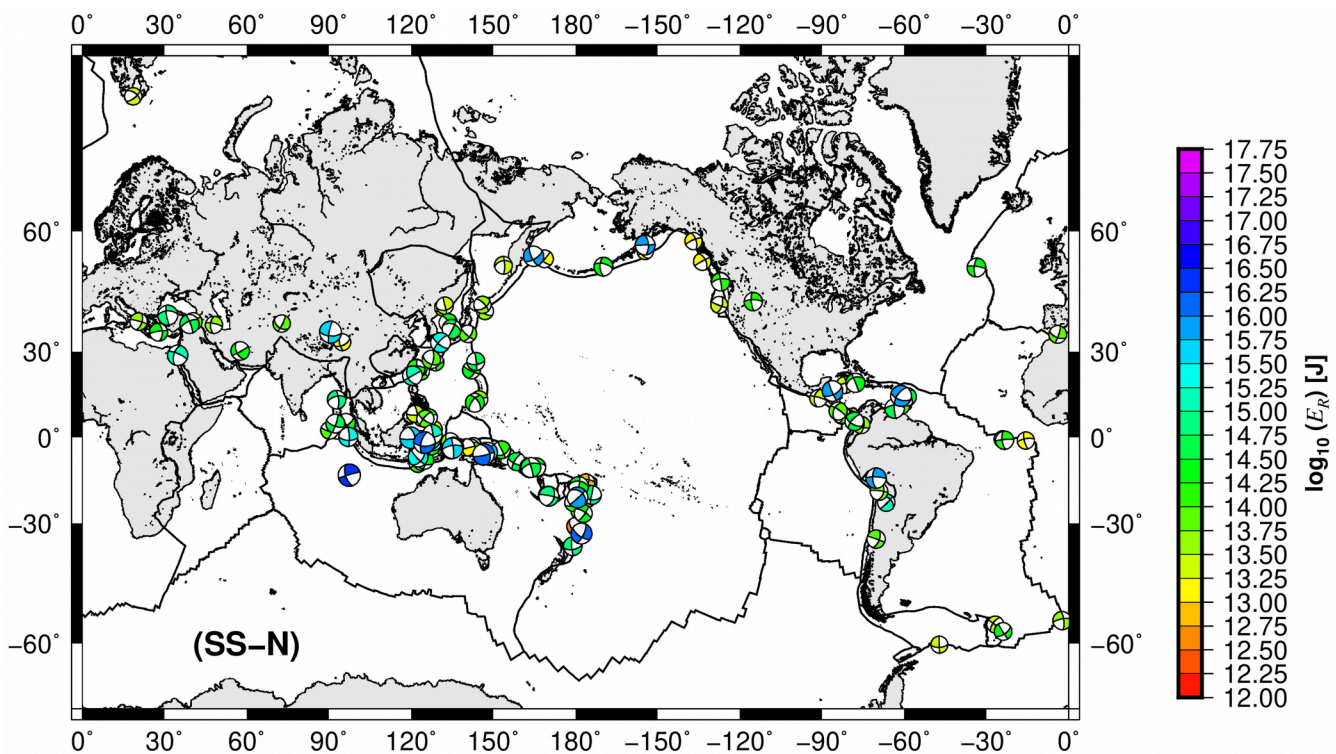

Figure S12. Spatial distribution of radiated seismic energy for SS-N events.



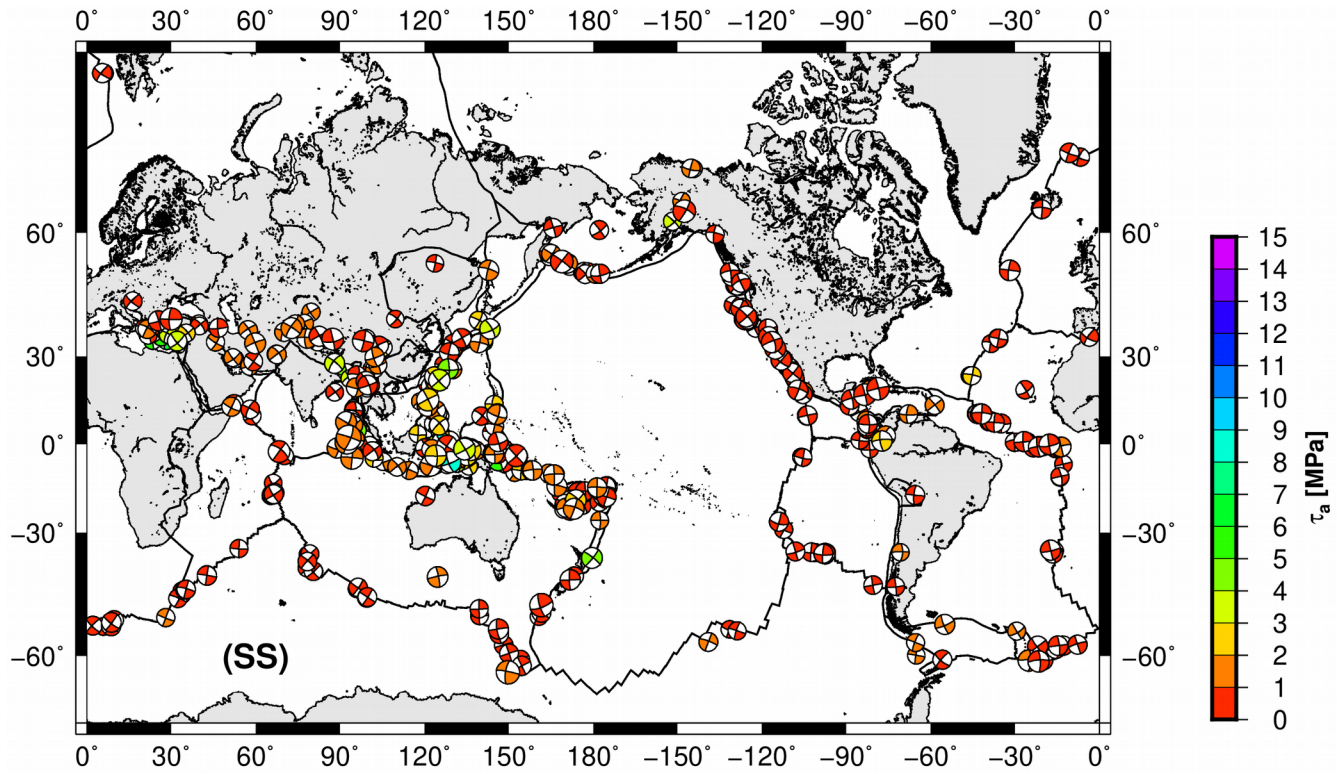

Figure S13. Spatial distribution of apparent stress for SS events.

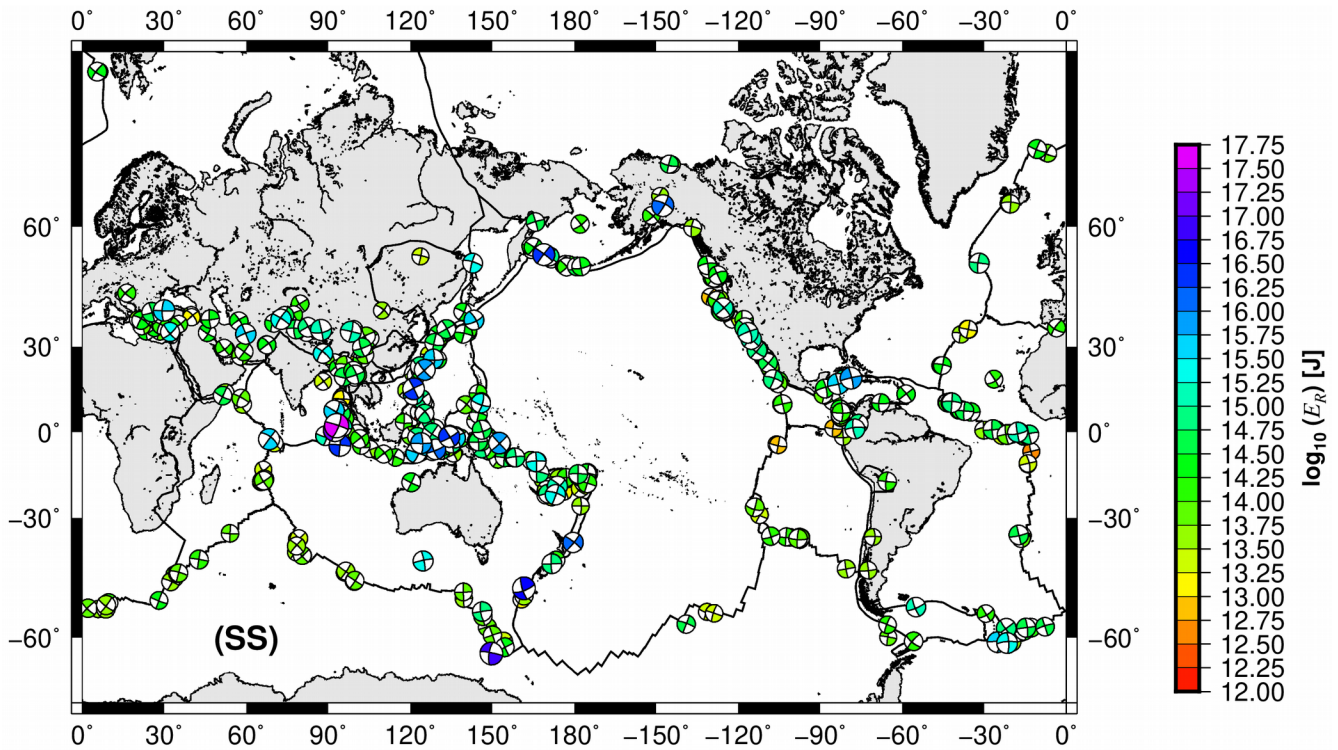

Figure S14. Spatial distribution of radiated seismic energy for SS events.
